# Supplementary material for: Flavonoids from duckweeds: potential applications in the human diet
Source: PubMed Central journal article supplement — RSC Adv. 2020 Dec 21;10(73):44981–8. doi: 10.1039/d0ra06741e (PMC9058668; doi:10.1039/d0ra06741e), 2020-12-21
Supplement: RA-010-D0RA06741E-s001.pdf [file RA-010-D0RA06741E-s001.pdf]

**Supplemental Table 1.** Statistical and variance proportions corresponding to the axis (PC1 and PC2) generated by Principal Component Analysis from the identified phenolic compounds in *Spirodela polyrhiza*, *Landoltia punctata*, *Lemna gibba*, *Wolffia borealis* and *Wolffia caudata*. (n=3).

| <b>Variable</b>                                         | <b>PC1</b>        | <b>PC2</b>        |
|---------------------------------------------------------|-------------------|-------------------|
| 5- <i>O</i> -( <i>E</i> )-Caffeoylquinic acid           | -0.361            | -0.151            |
| 3- <i>O</i> -( <i>E</i> )-Coumaroylquinic acid          | -0.312            | -0.130            |
| Luteolin-7- <i>O</i> -glucoside- <i>C</i> -glucoside    | 0.225             | -0.358            |
| 4- <i>O</i> -( <i>E</i> )-Coumaroylquinic acid          | -0.244            | -0.264            |
| Luteolin-6- <i>C</i> -glucoside-8- <i>C</i> -rhamnoside | 0.207             | -0.370            |
| luteolin-8- <i>c</i> -glycoside-6- <i>c</i> -rhamnoside | 0.269             | -0.264            |
| Luteolin-8- <i>C</i> -glycoside-6- <i>C</i> -xyloside   | 0.108             | 0.239             |
| N.I.                                                    | 0.036             | 0.291             |
| Luteolin-8- <i>C</i> - glycoside                        | -0.323            | 0.088             |
| Apigenin-8- <i>C</i> -glycoside                         | 0.207             | -0.374            |
| Apigenin-8- <i>C</i> -glycoside                         | 0.047             | -0.447            |
| Luteolin-7- <i>O</i> -glycoside                         | -0.363            | -0.152            |
| Apigenin-7- <i>O</i> -glycoside                         | -0.363            | -0.152            |
| Luteolin-8- <i>C</i> -(2- <i>O</i> -feruloyl) glycoside | -0.347            | -0.141            |
| <b>F - Anova</b>                                        | 96.626            | 106.230           |
| <b>P-value</b>                                          | <b>&lt;0.0001</b> | <b>&lt;0.0001</b> |
| <b>Eigenvalue</b>                                       | 6.712             | 4.479             |
| <b>Proportion</b>                                       | 0.479             | 0.320             |
